# Supplementary material for: Long Non-Coding RNA-PAICC Promotes the Tumorigenesis of Human Intrahepatic Cholangiocarcinoma by Increasing YAP1 Transcription
Source: PubMed Central journal article supplement (PMC7856545; doi:10.3389/fonc.2020.595533), 2021-01-08
Supplement: Image_1.pdf [file Image_1.pdf]

**A**

Transcript: lnc-AMOTL2-1:1

Basic information  
 LNCipedia transcript ID: lnc-AMOTL2-1:1  
 LNCipedia gene ID: lnc-AMOTL2-1  
 Ensembl Gene ID: ENSG00000206933  
 Ensembl Transcript ID: ENST00000568384  
 Location (hg38): chr3:134347288-134349233  
 Strand: -  
 Class: lincRNA  
 Sequence Ontology term: lincRNA  
 Transcript size: 1946 bp  
 Exons: 1  
 Sources: Gencode v13; Ensembl release 68 - Jul 2012; NONCODE v4; Ensembl release 75 - Feb 2014; Ensembl release 83 - Dec 2015; Ensembl release 87 - Dec 2016; Ensembl release 90 - Aug 2017; Ensembl release 92 - Apr 2018  
 Alternative transcript names: ENST00000568384.1; RP11-375i20.6-001; OTTHUMT00000431114.1; NONHSAT002234  
 Alternative gene names: ENSG00000206933.1; RP11-375i20.6; OTTHUMG00000175807.1; ACD10207.1

**B**

This is the Table View of CPC results. Your task ID is 700BE280-C5C1-11EA-A830-B663F6185444. You may use the ID to retrieve your results later in our [view/retrieve page](#). You can also view [raw data](#) of the CPC results.

| ID       | C/N/C     | CODING POTENTIAL SCORE | EVIDENCE | UTR-06 HITS | RNA-08 HITS |
|----------|-----------|------------------------|----------|-------------|-------------|
| user_seq | noncoding | -1.18876               | detail   | search      | search      |

^ EVIDENCE FEATURES SUMMARY

| HOMOLOGY FEATURES | HIT NUM        | HIT SCORE | FRAME SCORE | COVERAGE |
|-------------------|----------------|-----------|-------------|----------|
|                   | 0              | 0.0       | 0.0         | 10.48 %  |
| ORF_FRAMEFINDER   | LOG-ODDS SCORE | TYPE      |             |          |
|                   | 31.53          | Full      |             |          |

Legend: non-coding (blue) coding (red)

**C**

Coding Potential Assessment Tool

Result for species name : hg19 with job ID : 1568173729

| Data ID | Sequence Name | RNA Size | ORF Size | Ficket Score | Hexamer Score | Coding Probability | Coding Label |
|---------|---------------|----------|----------|--------------|---------------|--------------------|--------------|
| 0       | RP11-375i20.6 | 1946     | 306      | 0.456        | -0.0612531    | 0.0202654          | no           |

**D**

```

0001 CAGCAAAAC ACAGGCATGA AATAGACTCA TGGGCTTGTG CACATGCACA CCGCCACAA ACACCCATCA TAAGCCTCCA GGTAAACAAT ATGGGCATGC
0101 GCACCTTATAC ACACAGTTGC ACACACATAC ACATTTTTGG AGGCTTGAAT GCACACCCAG GCCCAACACA CACCCCTCA GCGAGGACA CATGGGTCCG
0201 CTAACAATGG ACTCAGTCTT CCTACAGGAG AATTTCTATT CTGAGCAAA ACCCAGCATC TGCACTCAAT GCGAAACAGA TGAATGGGAC AAAATTCACCT
0301 CATGTGTCTT GGTGGCCCTA CCAATACAGC CCTGAAGGAG CAGGCGCAG GCTTATCCCT TCACCAGCAG GCGTTGAGAA GGGCAAGACC AGGGTGGGGA
0401 TCAGGTTTTG CCAGGAGAAC ACTCAGAGCT TCTGGTACT GACTCAAAAG CAGGGGCCGA CAGCCTTGTG CATTCCGTAC AAGTAGGTCA CCATGACAAG
0501 GAGCACTGGC TCACATGCTG GGAOCTACGG TGAAGTAAA AGACTTGGGG AAAATCCAGC TGTGTGAGA CAGCCAGTGT TAGTAGGTGC TGCCCTCCCA
0601 TACCAGTGGG TTAGGTTGGG TCTATGACGC ACCGGAAGCTA TGGAGTGTGT GTCAGGGCA AGGGCTCCTG CTCAGCACAG CAAGAAGTGA GAGAAAGAA
0701 GGGCAGTGGC TTACCAAGGA CTGTAGCGCT GGGAAAGGAG GGTGAGGCCA GGGACACATT ATGAATAGTG TTATTTTTTA GCACACCAAT GTGTTAGGGC
0801 CTGTGCTGGG TGTTTTTCAT GTATTATCTT GCAAGATAGA GCCCTGCAAG TTAGATTTTA TTGCCTCCAT TTTACAGATG AGGAGACTGA GGCCTCAGAG
0901 GCTTAAATAA ATTAAGTCTG GTCTTGAAGT AATAGGGGCA GAGCTCAGAT ATGAGTCAAG GCTTGTCTGA CTCAGAGTCT CAGACTTTCT CAACATCTTC
1001 ATGTTGAAAG TAAACTTTGC ATTTTAAACT ATCAAAAGCA AGAGGGATCT AAGGAGACAT GGCACCTAAA GGTACTGTGG TATCCCGGAT GGGATCCTGG
1101 GAGAGAAAAT AAACATGAAG TTTAGTTAAT GACAATTTTA ATTGTGATAC ATGTACTTTA CTAATGCAAA AGTGTTAATA ATAGAGGAAA CTGGGTGGAG
1201 GGTATACAGG AACATTTTAT AGTATCTTAA TGATCTTGA AATCTAAAG TGTCCTAAA TAAAAGACTT ATTTTTTAAA CTTTGCATTT TTGCCAGCAG
1301 CAGGAAGCAG TAGATAACCA ACATTTCCAG GTGACGCTG TGTATAAGGC CTGAAGAGGC CAGGGCCCTT GAAAAGTTTC TCAAAATAAG AGGCCATTCT
1401 GGCATTTGTA CCACTGAGTT CCAATCAGCT ACATAAGTGT AAATAGAGAG ATTAATTGCA GGGCTGTGAT CACAGCACA ACCACCTTCC TAAATGGGGC
1501 AAAAGGGGCG TGAAGTCGGG CAGAGCAGCT GCAAACTGGC ATGAATCCC AAGGCTGTGA CAGAGAATTC TTGCTGGGTG TGCCGTGACC TCCTGACAAA
1601 TGTGGGCTGG CCAAGCTGAC GTCOCTCAT TTTCTCAAGT GTTGCACTA GAATGTAGTA GGAACAATGT ATAAGTCTTA TACTTCTTTT ATTAATTTTA
1701 TTCTTAGATA TCTTATCTTT AGTAATACTA CTATAAATGT AGTTGCTTTC TTGATTTGAT TTTCTGATAT TTTATTTGTA GTACATGAAA ATAAAATTTCA
1801 TTTTGTATA TTGATCTTAT GTTTTGTGAC CTTGCTGAGC TTGCTTATCA GTCTCAACAG TTTTGTAGTG GATTCCTTAG GATTTTCTAT ATACTGCAAG
1901 ATTATGGCAT CTACAATAA AGATAGTTTA AGTTCTTTCT TTCCAA

```

**Supplementary Figure 1 Basic information about lncRNA-PAICC comes from several online database.**

(A) The basic annotation information for lncRNA-PAICC from LNCipedia database. (B) Coding ability prediction results of lncRNA-PAICC from Coding Potential Calculator. (C) Coding ability prediction results of lncRNA-PAICC from Coding-Potential Assessment Tool. (D) The full sequence information of lncRNA-PAICC (1946bp).
